# Supplementary material for: Gadolinium-loaded polychelating amphiphilic polymer as an enhanced MRI contrast agent for human multiple myeloma and non Hodgkin's lymphoma (human Burkitt's lymphoma)
Source: Royal Society of Chemistry journal article supplement (doi:10.1039/c3ra45400b), 2014-01-01
Supplement: c3ra45400b1.pdf [file c3ra45400b1.pdf]

### Supplementary Material

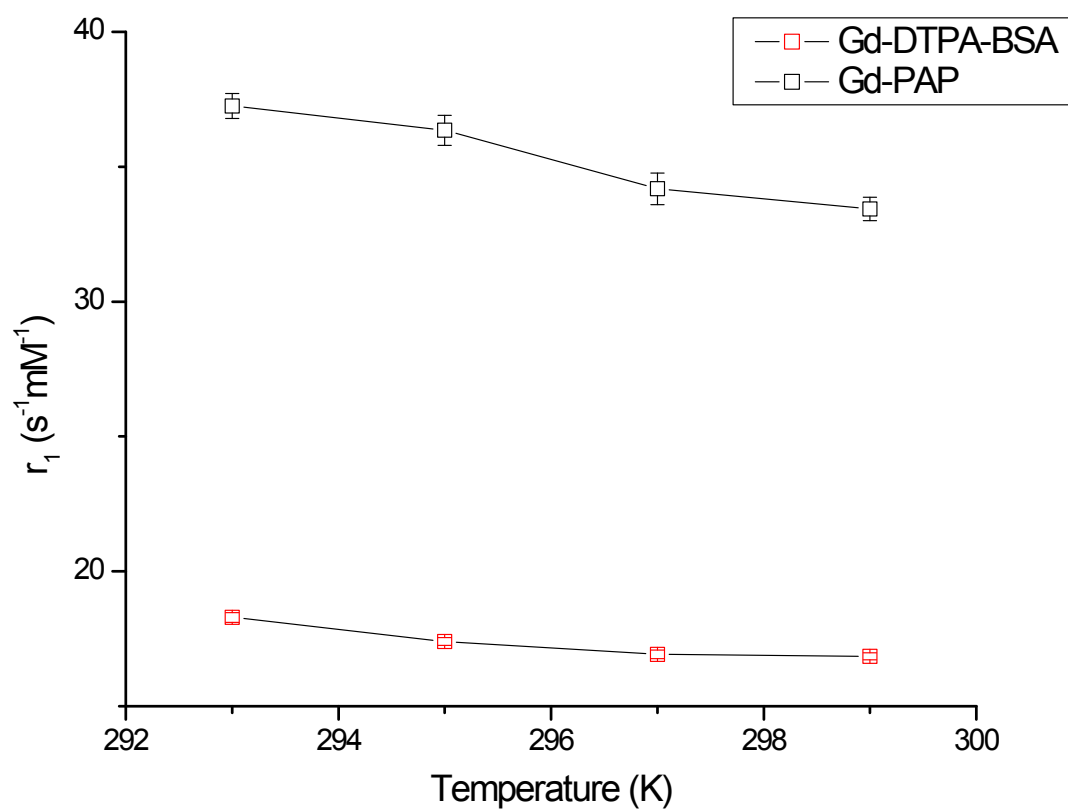

Supplementary Information

Figure S1. Temperature dependence of the water  $^1\text{H}$  relaxation for solutions of paramagnetic liposomes containing Gd-DTPA-BSA and Gd-DTPA-BSA.
